# Supplementary material for: Enhancement of Antioxidant and Anti-Glycation Properties of Beeswax Alcohol in Reconstituted High-Density Lipoprotein: Safeguarding against Carboxymethyllysine Toxicity in Zebrafish
Source: MDPI journal article supplement (doi:10.3390/antiox12122116), 2023-12-14
Supplement: s1 [file s1]

## Supplementary material

**Supplementary Figure S1.** Certificate of analysis (COA) for beeswax alcohol (BWA) from inspection of imported food, issued by Korean FDA

Print date: October 5, 2022

**Inspection results for imported food, etc.**

|                                               |              |                                                                                                       |                 |                    |
|-----------------------------------------------|--------------|-------------------------------------------------------------------------------------------------------|-----------------|--------------------|
| Import declaration person<br>(Import shipper) | Mutual       | Reidel Korea Co., Ltd.                                                                                | Representative  | Lee Kyung-ye       |
|                                               | Address      | Room 203, 2nd floor, 13-10 Gangnam-daero 39-gil, Seocho-gu, Seoul (Seocho-dong, Halla Vivavdi Studio) |                 |                    |
| Registration Number                           | 202200608546 |                                                                                                       | Date of receipt | September 26, 2022 |
| Product name                                  |              |                                                                                                       |                 |                    |
| Type of inspection                            |              |                                                                                                       |                 |                    |
| Requesting Agency                             |              |                                                                                                       |                 |                    |
| Request number                                |              |                                                                                                       |                 |                    |
| Inspection Agency                             |              |                                                                                                       |                 |                    |
| Judgment                                      |              |                                                                                                       |                 |                    |

정보공개용 자료

| Test/Inspection Item name                                                     | Standard                                                 | Result       | Judgment | Note                                |
|-------------------------------------------------------------------------------|----------------------------------------------------------|--------------|----------|-------------------------------------|
| Appearance                                                                    |                                                          |              | Pass     | 010-1) Sample                       |
| Octacosanol                                                                   |                                                          |              | Pass     | 010-1) Sample                       |
| 1-triacotanol                                                                 | ① 1-tetracosanol(C24): 60~150mg/g ② 1-hexacosanol (C26): | 292.25       | Pass     | Beeswax alcohol (No. 2010-1) sample |
| 1-dotriacotanol                                                               | ① 1-tetracosanol(C24): 60~150mg/g ② 1-hexacosanol (C26): | 222.97       | Pass     | Beeswax alcohol (No. 2010-1) sample |
| 1-tetracosanol, 1-hexacosanol, 1-octacosanol, 1-triacotanol, 1-dotriacotanol, | ① 1-tetracosanol(C24): 60~150mg/g ② 1-hexacosanol (C26): | 859.79       | Pass     | Beeswax alcohol (No. 2010-1) sample |
| Lead                                                                          | 0.5 or less                                              | 0.1          | Pass     | Beeswax alcohol (No. 2010-1) sample |
| Total arsenic                                                                 | 0.1 or less                                              | Not detected | Pass     | Beeswax alcohol (No. 2010-1) sample |
| Total mercury                                                                 | 0.5 or less                                              | Not detected | Pass     | Beeswax alcohol (No. 2010-1) sample |
| Cadmium                                                                       | 0.5 or less                                              | Not detected | Pass     | Beeswax alcohol (No. 2010-1) sample |
| Acetone                                                                       | 30.0 or less                                             | 2.73         | Pass     | Beeswax alcohol (No. 2010-1) sample |
| Hexane                                                                        | 5.0 or less                                              | 0.44         | Pass     | Beeswax alcohol (No. 2010-1) sample |
| 1-tetracosanol                                                                | ① 1-tetracosanol(C24): 60~150mg/g ② 1-hexacosanol (C26): | 63.67        | Pass     | Beeswax alcohol (No. 2010-1) sample |
| 1-Hexacosanol                                                                 | ① 1-tetracosanol(C24): 60~150mg/g ② 1-hexacosanol (C26): | 114.28       | Pass     | Beeswax alcohol (No. 2010-1) sample |

| Test/Inspection Item name | Standard                                                 | Result | Judgment | Note                                |
|---------------------------|----------------------------------------------------------|--------|----------|-------------------------------------|
| Coliforms                 | voice                                                    | voice  | Pass     | Beeswax alcohol (No. 2010-1) sample |
| Fatty alcohol             | ① 1-tetracosanol(C24): 60~150mg/g ② 1-hexacosanol (C26): | 30.62  | Pass     | Beeswax alcohol (No. 2010-1) sample |

These test results are limited to the samples requested for testing, and the test results must not be used for false, exaggerated labeling, advertising, or slander purposes. If you wish to use them for labeling or advertising, the entire test results must be truthfully displayed. It must be advertised.

September 30, 2022

Director of the Korea Food Science Research Institute, an affiliate of the Korea Food Industry Association

## Inspection results for imported food, etc.

|                                         |              |                                                                                                     |                 |                    |
|-----------------------------------------|--------------|-----------------------------------------------------------------------------------------------------|-----------------|--------------------|
| Imported food, etc.<br>(Import shipper) | Mutuel       | Reidel Korea Co., Ltd.                                                                              | Import date     | See Receipt        |
|                                         | address      | Room 205, 2nd floor, 15-10 Gangnam-daero 39-gil, Seocho-gu, Seoul (Seocho-dong, Halla Vivid Studio) |                 |                    |
| Requester Number                        | 202200608546 |                                                                                                     | Date of receipt | September 26, 2022 |
| product name                            |              |                                                                                                     |                 |                    |
| Type of inspection                      |              |                                                                                                     |                 |                    |
| Requesting Agency                       |              |                                                                                                     |                 |                    |
| Request number                          |              |                                                                                                     |                 |                    |
| Inspection Agency                       |              |                                                                                                     |                 |                    |
| Judgment                                |              |                                                                                                     |                 |                    |

  

| Test/Inspection Item name | result       | result       | Judgment | note       |
|---------------------------|--------------|--------------|----------|------------|
| Desulfonylchlorosilide    |              |              |          |            |
| glimepiride               |              |              |          |            |
| glibenclamide             | Not detected | Not detected | Fitness  | Sample (T) |
| glee closet               | Not detected | Not detected | Fitness  | Sample (T) |
| glyphigit                 | Not detected | Not detected | Fitness  | Sample (T) |
| nomeobardenafil           | Not detected | Not detected | Fitness  | Sample (T) |
| Norneosildenafil          | Not detected | Not detected | Fitness  | Sample (T) |
| Nitrodenafil              | Not detected | Not detected | Fitness  | Sample (T) |
| dimethyl reddenafl        | Not detected | Not detected | Fitness  | Sample (T) |
| desulfovadenafil          | Not detected | Not detected | Fitness  | Sample (T) |
| Desmethyisbutramine       | Not detected | Not detected | Fitness  | Sample (T) |
| DiDesmethyisbutramine     | Not detected | Not detected | Fitness  | Sample (T) |
| Dimethylsildenafil        | Not detected | Not detected | Fitness  | Sample (T) |

| Test/Inspection Item name | result       | result       | Judgment | note       |
|---------------------------|--------------|--------------|----------|------------|
| Dimethylthiosildenafil    | Not detected | Not detected | Fitness  | Sample (T) |
| Dichlorodenafil           | Not detected | Not detected | Fitness  | Sample (T) |
| Levothyroxine             | Not detected | Not detected | Fitness  | Sample (T) |
| Liocronine                | Not detected | Not detected | Fitness  | Sample (T) |
| Mirodenafil               | Not detected | Not detected | Fitness  | Sample (T) |
| vardenafil                | Not detected | Not detected | Fitness  | Sample (T) |
| Benzylsildenafil          | Not detected | Not detected | Fitness  | Sample (T) |
| pseudovardenafil          | Not detected | Not detected | Fitness  | Sample (T) |
| Sibutramine               | Not detected | Not detected | Fitness  | Sample (T) |
| Cinnamildenafil           | Not detected | Not detected | Fitness  | Sample (T) |
| Slidenafil                | Not detected | Not detected | Fitness  | Sample (T) |
| Cyclopentinafil           | Not detected | Not detected | Fitness  | Sample (T) |
| Aminotadafafi             | Not detected | Not detected | Fitness  | Sample (T) |
| Acetylvaridenafil         | Not detected | Not detected | Fitness  | Sample (T) |
| ephedrine                 | Not detected | Not detected | Fitness  | Sample (T) |
| orlistat                  | Not detected | Not detected | Fitness  | Sample (T) |
| Oxohongdenafil            | Not detected | Not detected | Fitness  | Sample (T) |
| octylnoradafafi           | Not detected | Not detected | Fitness  | Sample (T) |
| Udenafil                  | Not detected | Not detected | Fitness  | Sample (T) |
| xanthoxanthraphyll        | Not detected | Not detected | Fitness  | Sample (T) |
| Thiosildenafil            | Not detected | Not detected | Fitness  | Sample (T) |
| Thioquina Piperipil       | Not detected | Not detected | Fitness  | Sample (T) |
| Chiohomosildenafil        | Not detected | Not detected | Fitness  | Sample (T) |
| Carbodenafil              | Not detected | Not detected | Fitness  | Sample (T) |

| Test/Inspection Item name            | Article #    | result       | Judgement | note       |
|--------------------------------------|--------------|--------------|-----------|------------|
| chlorodenafil                        | Not detected | Not detected | Others    | Sample (1) |
| Chloropretadafil                     | Not detected | Not detected | Others    | Sample (1) |
| tadalafil                            | Not detected | Not detected | Others    | Sample (1) |
| Fenfuramine                          | Not detected | Not detected | Others    | Sample (1) |
| piperidino reddenafl                 | Not detected | Not detected | Others    | Sample (1) |
| Hydroxyvaridenafil                   | Not detected | Not detected | Others    | Sample (1) |
| Hydroxythiohomosildenafil            | Not detected | Not detected | Others    | Sample (1) |
| Hydroxychlorodenafil                 | Not detected | Not detected | Others    | Sample (1) |
| Hydroxyhomosildenafil                | Not detected | Not detected | Others    | Sample (1) |
| Hydroxydenafil                       | Not detected | Not detected | Others    | Sample (1) |
| homosildenafil                       | Not detected | Not detected | Others    | Sample (1) |
| Homogdenafil                         | Not detected | Not detected | Others    | Sample (1) |
| fluoxetine                           | Not detected | Not detected | Others    | Sample (1) |
| Sennoside                            | Not detected | Not detected | Others    | Sample (1) |
| Tubamox                              | Not detected | Not detected | Others    | Sample (1) |
| Phenolphthalein                      | Not detected | Not detected | Others    | Sample (1) |
| Ikarin                               | Not detected | Not detected | Others    | Sample (1) |
| N-nitrosufenfuramine                 | Not detected | Not detected | Others    | Sample (1) |
| Desmethylpiperazinypropoxyside Nafil | Not detected | Not detected | Others    | Sample (1) |
| Acetaminotadalafil                   | Not detected | Not detected | Others    | Sample (1) |
| Demethyltadalafil                    | Not detected | Not detected | Others    | Sample (1) |
| avanafil                             | Not detected | Not detected | Others    | Sample (1) |
| Methylhydroxyhomosildenafil          | Not detected | Not detected | Others    | Sample (1) |
| Propoxyphenylthiosildenafil          | Not detected | Not detected | Others    | Sample (1) |

| Test/Inspection Item name              | Article #    | result       | Judgement | note       |
|----------------------------------------|--------------|--------------|-----------|------------|
| Propoxyphenylthioayildenafil           | Not detected | Not detected | Others    | Sample (1) |
| Propoxyphenylthiohydroxyhomosildenafil | Not detected | Not detected | Others    | Sample (1) |
| Propoxyphenylthiohomosildenafil        | Not detected | Not detected | Others    | Sample (1) |
| Homotadalafil                          | Not detected | Not detected | Others    | Sample (1) |
| Chloroxybutramine                      | Not detected | Not detected | Others    | Sample (1) |
| cis-cyclopentyltadalafil               | Not detected | Not detected | Others    | Sample (1) |
| trans-cyclopentyltadalafil             | Not detected | Not detected | Others    | Sample (1) |
| Isopropyl Nortadalafil                 | Not detected | Not detected | Others    | Sample (1) |
| Descarbonylsildenafil                  | Not detected | Not detected | Others    | Sample (1) |
| Cascaroside                            | Not detected | Not detected | Others    | Sample (1) |
| Dichloropropyl Carbodenafil            | Not detected | Not detected | Others    | Sample (1) |
| Chloroxyphenramine                     | Not detected | Not detected | Others    | Sample (1) |
| Acrylic acid                           | Not detected | Not detected | Others    | Sample (1) |
| Gendenafil                             | Not detected | Not detected | Others    | Sample (1) |
| Imidazogetriazinone                    | Not detected | Not detected | Others    | Sample (1) |

These test results are limited to the samples requested for testing, and the test results must not be used for false, exaggerated labeling, advertising, or slander purposes. If you wish to use them for labeling or advertising, the entire test results must be truthfully displayed. It must be advertised.

September 29, 2022

Seoul Regional Food and Drug Safety Administration

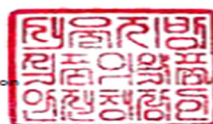

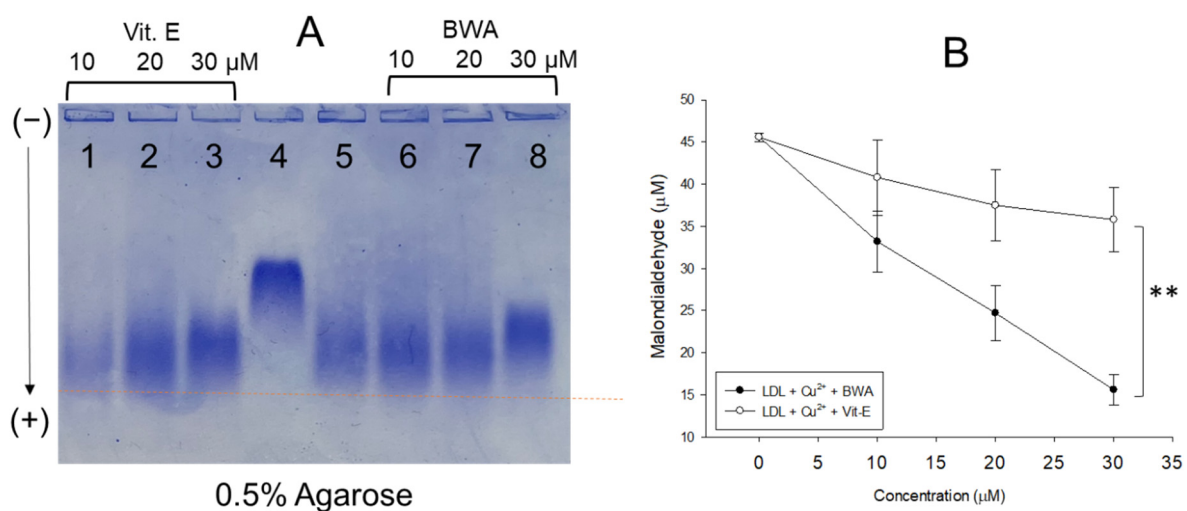

**Supplementary Figure S2.** Effect of beeswax alcohol (BWA) on  $\text{CuSO}_4$  induced oxidation of LDL.

- A.** Electrophoretic mobility of apo-B fraction of LDL. Lane 1, 2, 3, represent LDL+ $\text{CuSO}_4$  treated with 10, 20, 30,  $\mu$ M vitamin E. Lane 4 represents Native LDL, Lane 5 represents LDL+ $\text{CuSO}_4$  (Ox LDL). Lane 6, 7, 8, represent LDL+ $\text{CuSO}_4$  treated with 10, 20, 30,  $\mu$ M BWA. Electrophoresis was performed on 0.5% agarose gel using Tri-EDTA buffer (pH 8.0) at a constant voltage (50 V). Red-dotted line indicates the similar electromobility of oxidized LDL (lane 5) and Vit-E treated ox-LDL (lane 1–3).
- B.** Quantification of malondialdehyde in the LDL by thiobarbituric acid reactive substances (TBARS) assay. \*\*,  $p < 0.01$

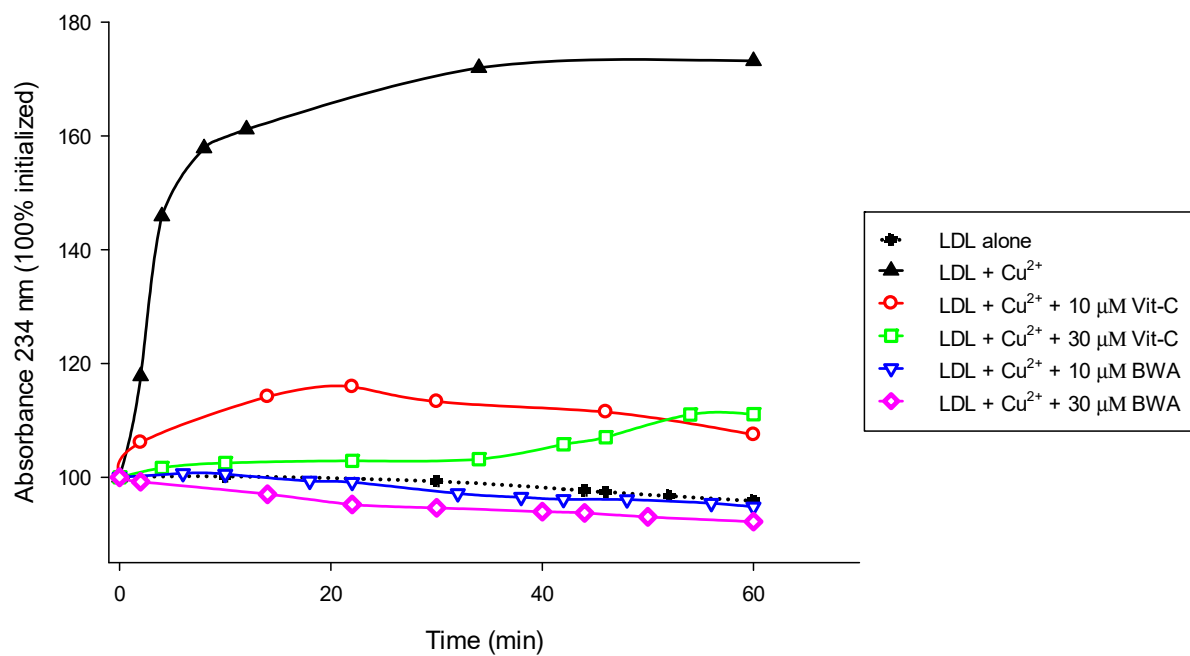

**Supplementary Figure S3.** Continuous monitoring of conjugated diene detection assay with either beeswax alcohol (BWA) or vitamin C (Vit C) under LDL oxidation by cupric ion treatment.
